# Supplementary material for: Visualisation of a flexible modular structure of the ER folding-sensor enzyme UGGT
Source: PubMed Central journal article supplement (PMC5610325; doi:10.1038/s41598-017-12283-w), 2017-09-22
Supplement: 41598_2017_12283_MOESM1_ESM.pdf [file 41598_2017_12283_MOESM1_ESM.pdf]

## Supplementary information

### Visualisation of a flexible modular structure of the ER folding-sensor enzyme UGGT

Tadashi Satoh<sup>1,2,\*</sup>, Chihong Song<sup>3</sup>, Tong Zhu<sup>1,4,5,6</sup>, Takayasu Toshimori<sup>1,5</sup>, Kazuyoshi Murata<sup>3,7</sup>, Yugo Hayashi<sup>8</sup>, Hironari Kamikubo<sup>8</sup>, Takayuki Uchihashi<sup>9</sup> and Koichi Kato<sup>1,4,5,6\*</sup>

<sup>1</sup>Graduate School of Pharmaceutical Sciences, Nagoya City University, 3-1 Tanabe-dori, Mizuho-ku, Nagoya 467-8603, Japan; <sup>2</sup>JST, PRESTO, 3-1 Tanabe-dori, Mizuho-ku, Nagoya 467-8603, Japan; <sup>3</sup>National Institute for Physiological Sciences, <sup>4</sup>Okazaki Institute for Integrative Bioscience, and <sup>5</sup>Institute for Molecular Science, National Institutes of Natural Sciences, 5-1 Higashiyama, Myodaiji, Okazaki, Aichi 444-8787, Japan; <sup>6</sup>School of Physical Sciences and <sup>7</sup>School of Life Science, SOKENDAI (The Graduate University for Advanced Studies), 5-1 Higashiyama, Myodaiji, Okazaki, Aichi 444-8787, Japan; <sup>8</sup>Graduate School of Materials Science, Nara Institute of Science and Technology, 8916-5, Takayama, Ikoma, Nara, 630-0192, Japan; <sup>9</sup>Department of Physics, Nagoya University, Furo-cho, Chikusa-ku, Nagoya 464-8602, Japan

## Supplemental methods

### Epitope mapping of anti-UGGT antibody

We purchased anti-UGGT antibody, which was created by a phage display technique using UGGT<sup>FL</sup> as an antigen (GeneFrontier Co., Ltd., Japan). For epitope mapping of the obtained anti-UGGT antibody, we prepared a series of UGGT<sup>N</sup>-derived fragments. Based on the previous bioinformatic analysis<sup>11</sup>, we prepared four fragments that were expressed as the soluble fraction in *E. coli*: Segment 1 (residues 672–833), Segment 2 (residues 469–833), Segment 3 (residues 29–833) and Segment 4 (residues 29–1189). The current crystallographic data revealed that Segments 1–4 contained the following domain fragments: Segment 1, Trx3 domain; Segment 2, Trx2 and Trx3 domains; Segment 3, Trx1, Trx4, Trx2, Trx3 and  $\beta$ -rich domains; and Segment 4, whole folding-sensor region. Dot blot analysis showed that the UGGT antibody reacted against Segments 3 and 4, but not Segments 1, 2 and CAT domain (Supplemental Fig. S11). These results together with the EM data (Fig. 4b) indicated that the UGGT antibody specifically recognises the Trx4 domain.

**Table S1: Crystallographic data collection and refinement statistics for the UGGT folding-sensor domain**

| <b>Data collection</b>                                     | UGGT <sup>N</sup>                                                          |
|------------------------------------------------------------|----------------------------------------------------------------------------|
| Crystallisation conditions*                                | 2.00 M ammonium sulphate, 0.1 M Tris-HCl (pH 7.0), 10% IPTG, 5 days, 25 °C |
| Space group                                                | <i>P</i> 3 <sub>2</sub> 12                                                 |
| Unit cell parameters ( <i>a</i> , <i>b</i> , <i>c</i> [Å]) | 195.1, 195.1, 142.3                                                        |
| Beamline                                                   | PF-AR NE3A                                                                 |
| Wavelength (Å)                                             | 0.97864                                                                    |
| Resolution range (Å)                                       | 50–3.10                                                                    |
| Number of total reflections                                | 285,343                                                                    |
| Number of unique reflections                               | 105,778                                                                    |
| <i>R</i> <sub>merge</sub> (%)                              | 4.2 (63.9)                                                                 |
| <i>I</i> / $\sigma(I)$                                     | 14.4 (1.4)                                                                 |
| <i>CC</i> <sub>1/2</sub>                                   | 0.999 (0.768)                                                              |
| Completeness (%)                                           | 96.4 (98.3)                                                                |
| Redundancy                                                 | 2.7 (2.8)                                                                  |
| <b>Refinement</b>                                          |                                                                            |
| Resolution range (Å)                                       | 19.97–3.10                                                                 |
| <i>R</i> <sub>work</sub> / <i>R</i> <sub>free</sub> (%)    | 23.2/27.8                                                                  |
| R.m.s.d. bond length (Å) and angles (°)                    | 0.014/2.27                                                                 |
| Ramachandran plot (%)                                      |                                                                            |
| Most favoured                                              | 74.2                                                                       |
| Additionally allowed                                       | 22.7                                                                       |
| Generously allowed                                         | 2.5                                                                        |
| Disallowed                                                 | 0.5                                                                        |
| Number of atoms (A/B)                                      | 7159/7159                                                                  |
| Average <i>B</i> -values (Å <sup>2</sup> )                 | 124.8/121.7                                                                |

\*Crystals were cryoprotected with the crystallisation buffer containing 15% glycerol and flash-cooled in liquid nitrogen.

**Table S2: SAD and MAD data collection of the UGGT folding-sensor domain**

| <b>Data collection</b>                                        | SeMet-non-mutated<br>UGGT <sup>N</sup> (Peak)                                                      | K <sub>2</sub> PtCl <sub>4</sub> -UGGT <sup>N</sup><br>(Pt-edge)                                                                                                                                                                 | K <sub>2</sub> PtCl <sub>4</sub> -UGGT <sup>N</sup><br>(Pt-high-remote) |
|---------------------------------------------------------------|----------------------------------------------------------------------------------------------------|----------------------------------------------------------------------------------------------------------------------------------------------------------------------------------------------------------------------------------|-------------------------------------------------------------------------|
| Crystallisation condition*                                    | 1.95 M ammonium sulphate, 0.1 M Tris-HCl (pH 7.0), 8.3 mM <i>n</i> -decanoylsucrose, 5 days, 20 °C | [Crystallisation]<br>2.00 M ammonium sulphate, 0.1 M Tris-HCl (pH 7.0), 8.3% IPTG, 5 days, 25 °C<br>[Soaking]<br>2.0 M ammonium sulphate, 0.1 M Tris-HCl (pH 7.0), 8.3% IPTG, 5 mM K <sub>2</sub> PtCl <sub>4</sub> , 6 h, 25 °C | Same as Pt-edge                                                         |
| Space group                                                   | <i>P</i> 6 <sub>2</sub> 22                                                                         | <i>P</i> 6 <sub>2</sub> 22                                                                                                                                                                                                       | <i>P</i> 6 <sub>2</sub> 22                                              |
| Unit cell parameters<br>( <i>a</i> , <i>b</i> , <i>c</i> [Å]) | 196.4, 196.4, 143.9                                                                                | 195.4, 195.4, 142.6                                                                                                                                                                                                              | 195.1, 195.1, 142.7                                                     |
| Beamline                                                      | PF BL1A                                                                                            | SPring-8 BL44XU                                                                                                                                                                                                                  | SPring-8 BL44XU                                                         |
| Wavelength (Å)                                                | 0.97920                                                                                            | 1.07227                                                                                                                                                                                                                          | 1.05404                                                                 |
| Resolution range (Å)                                          | 50–3.50                                                                                            | 50–3.60                                                                                                                                                                                                                          | 50–3.61                                                                 |
| Number of total reflections                                   | 403,575                                                                                            | 227,315                                                                                                                                                                                                                          | 226,510                                                                 |
| Number of unique reflections                                  | 21,052                                                                                             | 34,727                                                                                                                                                                                                                           | 34,466                                                                  |
| <i>R</i> <sub>merge</sub> (%)                                 | 14.5 (162.6)                                                                                       | 9.2 (107.4)                                                                                                                                                                                                                      | 7.6 (98.2)                                                              |
| <i>I</i> / $\sigma(I)$                                        | 22.1 (1.7)                                                                                         | 13.2 (2.0)                                                                                                                                                                                                                       | 14.5 (2.0)                                                              |
| <i>CC</i> <sub>1/2</sub>                                      | (0.892)                                                                                            | 0.999 (0.678)                                                                                                                                                                                                                    | 0.999 (0.690)                                                           |
| Completeness (%)                                              | 100.0 (100.0)                                                                                      | 98.6 (99.0)                                                                                                                                                                                                                      | 98.4 (97.8)                                                             |
| Redundancy                                                    | 19.2 (20.5)                                                                                        | 6.5 (6.5)                                                                                                                                                                                                                        | 6.6 (6.6)                                                               |

\*Crystals were cryoprotected with the crystallisation buffer containing 15% glycerol and flash-cooled in liquid nitrogen.

**Table S3: Crystallographic data collection of the domain-specific Met-labelled UGGT folding-sensor domain**

| <b>Data collection</b>                                     | SeMet-<br>$\beta$ -Trx1*-UGGT <sup>N</sup>                                                            | SeMet-<br>Trx2-3*-UGGT <sup>N</sup>                                          | SeMet-<br>Trx4*-UGGT <sup>N</sup>                                                                 |
|------------------------------------------------------------|-------------------------------------------------------------------------------------------------------|------------------------------------------------------------------------------|---------------------------------------------------------------------------------------------------|
| Crystallisation conditions*                                | 1.95 M ammonium sulphate, 0.1 M Bis-tris-HCl (pH 6.5), 25 mM <i>n</i> -decanoylsucrose, 5 days, 20 °C | 2.00 M ammonium sulphate, 0.1 M Tris-HCl (pH 7.0), 8.3% IPTG, 10 days, 20 °C | 1.95 M ammonium sulphate, 0.1 M Tris-HCl (pH 7.0), 25 mM <i>n</i> -decanoylsucrose, 5 days, 20 °C |
| Space group                                                | <i>P</i> 6 <sub>2</sub> 22                                                                            | <i>P</i> 6 <sub>2</sub> 22                                                   | <i>P</i> 6 <sub>2</sub> 22                                                                        |
| Unit cell parameters ( <i>a</i> , <i>b</i> , <i>c</i> [Å]) | 194.8, 194.8, 142.3                                                                                   | 194.4, 194.4, 142.8                                                          | 195.2, 195.2, 142.6                                                                               |
| Beamline                                                   | SPring-8 BL44XU                                                                                       | NSRRC 13B1                                                                   | SPring-8 BL44XU                                                                                   |
| Wavelength (Å)                                             | 0.97907                                                                                               | 0.97934                                                                      | 0.97907                                                                                           |
| Resolution range (Å)                                       | 50–5.20                                                                                               | 50–3.30                                                                      | 50–3.65                                                                                           |
| Number of total reflections                                | 29998                                                                                                 | 688,203                                                                      | 217,974                                                                                           |
| Number of unique reflections                               | 6552                                                                                                  | 24,516                                                                       | 18,458                                                                                            |
| <i>R</i> <sub>merge</sub> (%)                              | 20.0 (84.3)                                                                                           | 13.3 (202.8)                                                                 | 10.4 (83.1)                                                                                       |
| <i>I</i> / $\sigma(I)$                                     | 14.4 (3.7)                                                                                            | 43.3 (2.1)                                                                   | 38.3 (3.8)                                                                                        |
| <i>CC</i> <sub>1/2</sub>                                   | (0.773)                                                                                               | (0.838)                                                                      | (0.845)                                                                                           |
| Completeness (%)                                           | 94.3 (95.0)                                                                                           | 100.0 (100.0)                                                                | 97.4 (99.1)                                                                                       |
| Redundancy                                                 | 4.9 (5.0)                                                                                             | 28.1 (27.3)                                                                  | 12.1 (12.2)                                                                                       |

\*Crystals were cryoprotected with the crystallisation buffer containing 15% glycerol and flash-cooled in liquid nitrogen.

**Table S4: Crystallographic data collection and refinement statistics for the UGGT catalytic domain**

| <b>Data collection</b>                  | UDP-Glc-bound          | UDP-bound           |
|-----------------------------------------|------------------------|---------------------|
| Space group                             | $P2_12_12_1$           | $P2_12_12_1$        |
| Unit cell parameters ( $a, b, c$ [Å])   | 45.5, 47.2, 129.8      |                     |
| Beamline                                | PF-AR NW12A            | PF BL5A             |
| Wavelength (Å)                          | 0.97934                | 1.00000             |
| Resolution range (Å)                    | 47.27–1.40 (1.48–1.40) | 50–1.35 (1.43–1.35) |
| Number of total reflections             | 775,641                | 437,543             |
| Number of unique reflections            | 56,063                 | 62,275              |
| $R_{\text{merge}}$ (%)                  | 14.0 (60.0)            | 8.8 (79.6)          |
| $I / \sigma(I)$                         | 7.7 (2.6)              | 12.8 (1.9)          |
| $CC_{1/2}$                              | 0.994 (0.834)          | 0.998 (0.750)       |
| Completeness (%)                        | 100.0 (100.0)          | 99.1 (94.5)         |
| Redundancy                              | 7.1 (7.0)              | 7.0 (6.2)           |
| <b>Refinement</b>                       |                        |                     |
| Resolution range (Å)                    | 20.0–1.40              | 20.0–1.35           |
| $R_{\text{work}} / R_{\text{free}}$ (%) | 14.2/17.4              | 16.8/20.8           |
| R.m.s.d. bond length (Å) and angles (°) | 0.016/1.59             | 0.014/1.67          |
| Ramachandran plot (%)                   |                        |                     |
| Most favoured                           | 93.9                   | 94.6                |
| Additionally allowed                    | 6.1                    | 5.4                 |
| Generously allowed                      | 0                      | 0                   |
| Disallowed                              | 0                      | 0                   |
| Number of molecules                     |                        |                     |
| Protein atoms                           | 2305                   | 2240                |
| Ligands                                 | 43                     | 34                  |
| Water molecules                         | 263                    | 220                 |
| Average $B$ -values (Å <sup>2</sup> )   |                        |                     |
| Protein atoms                           | 17.3                   | 15.4                |
| Ligands                                 | 18.2                   | 13.9                |
| Water molecules                         | 28.7                   | 23.7                |

**Table S5: SAXS data collection and refinement statistics for the full-length UGGT**

| <b>Data collection parameters</b>        | UGGT <sup>FL</sup>             | UGGT <sup>N</sup> |
|------------------------------------------|--------------------------------|-------------------|
| Diffractionmeter                         | Nano-Viewer (RIGAKU)           |                   |
| Detector                                 | PILATUS 200K                   |                   |
| Beam geometry                            | pin hole slit ( $\phi$ 0.8 mm) |                   |
| Wavelength ( $\text{\AA}$ )              | 1.5418                         |                   |
| $Q$ range                                | 0.012–0.25                     |                   |
| Exposure time (min)                      | 30                             |                   |
| Concentration range (mg/ml)              | 2–5                            |                   |
| <b>Structural parameters</b>             |                                |                   |
| $I(0)/\text{conc.}$ (from $P[r]$ )       | $21.7 \pm 0.2$                 | $18.9 \pm 0.3$    |
| $R_g$ ( $\text{\AA}$ ) (from $P[r]$ )    | $45.2 \pm 0.5$                 | $46.5 \pm 0.8$    |
| $I(0)/\text{conc.}$ (from Guinier)       | $21.3 \pm 0.8$                 | $19.0 \pm 0.5$    |
| $R_g$ ( $\text{\AA}$ ) (from Guinier)    | $45 \pm 2.0$                   | $46 \pm 1.2$      |
| $D_{\text{max}}$ ( $\text{\AA}$ )        | 150                            | 155               |
| Porod volume estimate ( $\text{\AA}^3$ ) | 392000                         | 393000            |
| <b>Molecular mass determinant</b>        |                                |                   |
| M.W. (kDa) (from Guinier $I[0]$ )        | $164 \pm 6.0$                  | $146 \pm 2.3$     |
| Calculated M.W. (kDa)                    | 170                            | 123               |

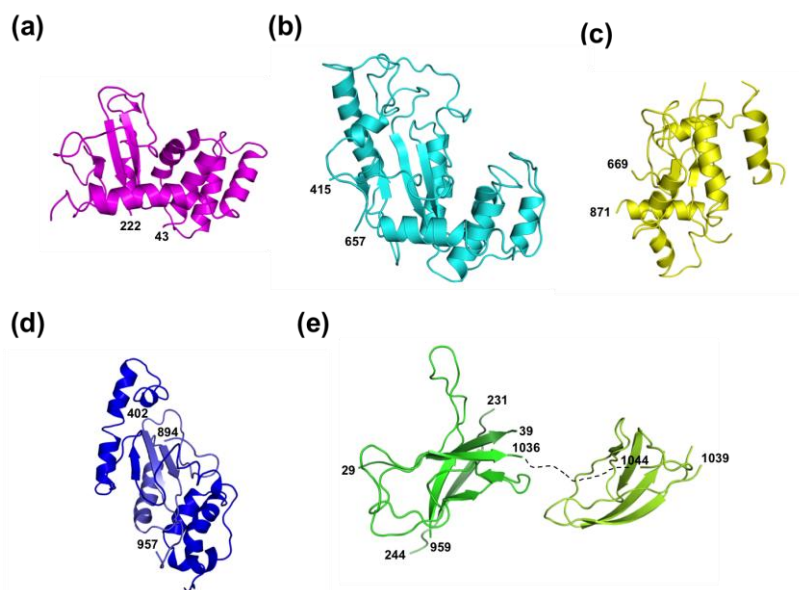

**Fig. S1.** Structures of individual domains of UGGT<sup>N</sup>; (a) Trx1, (b) Trx2, (c) Trx3, (d) Trx4 and (e) β-rich domains. Positions of N- and C-terminal domain boundaries are indicated with the residue numbers. In the models of Trx4 and β-rich domains, the nonconsecutive segments are shown in same colors together with the residue numbers. N- and C-terminal subdomains of the β-rich domain are coloured green and lemon, respectively. Homology model of the C-terminal β-rich subdomain was constructed by SWISS-MODEL<sup>31</sup> using crystal structure of β-rich domain of human carboxypeptidase N (PDB code: 2NSM) as a template.

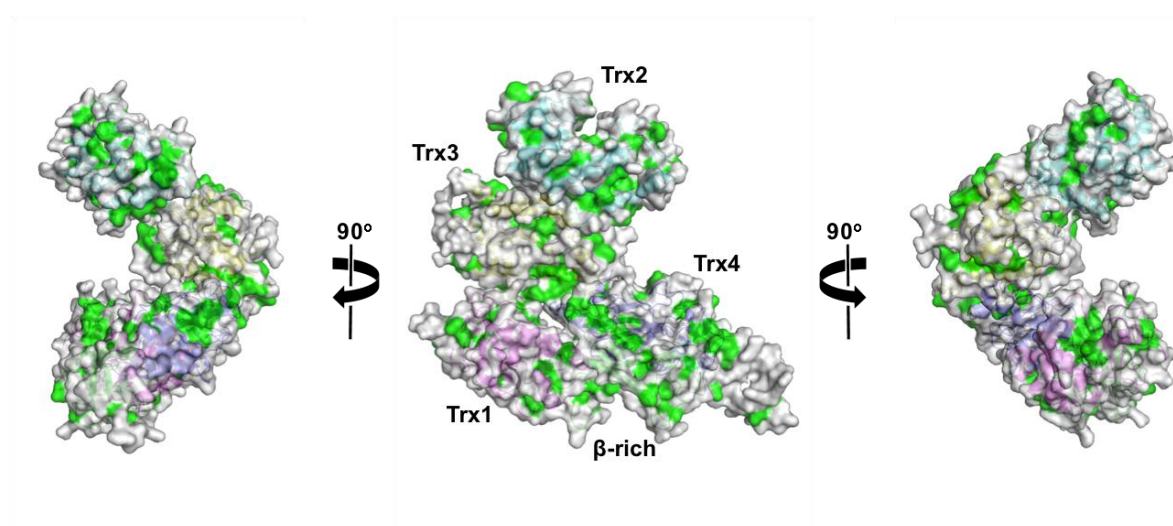

**Fig. S2.** Surface hydrophobicity of folding-sensor domain of UGGT. Molecular surface representation of the folding-sensor domain of UGGT. The hydrophobic residues are shown in green. The model was created by SWISS-MODEL<sup>31</sup> complementing with the disordered segments in the crystal structure.



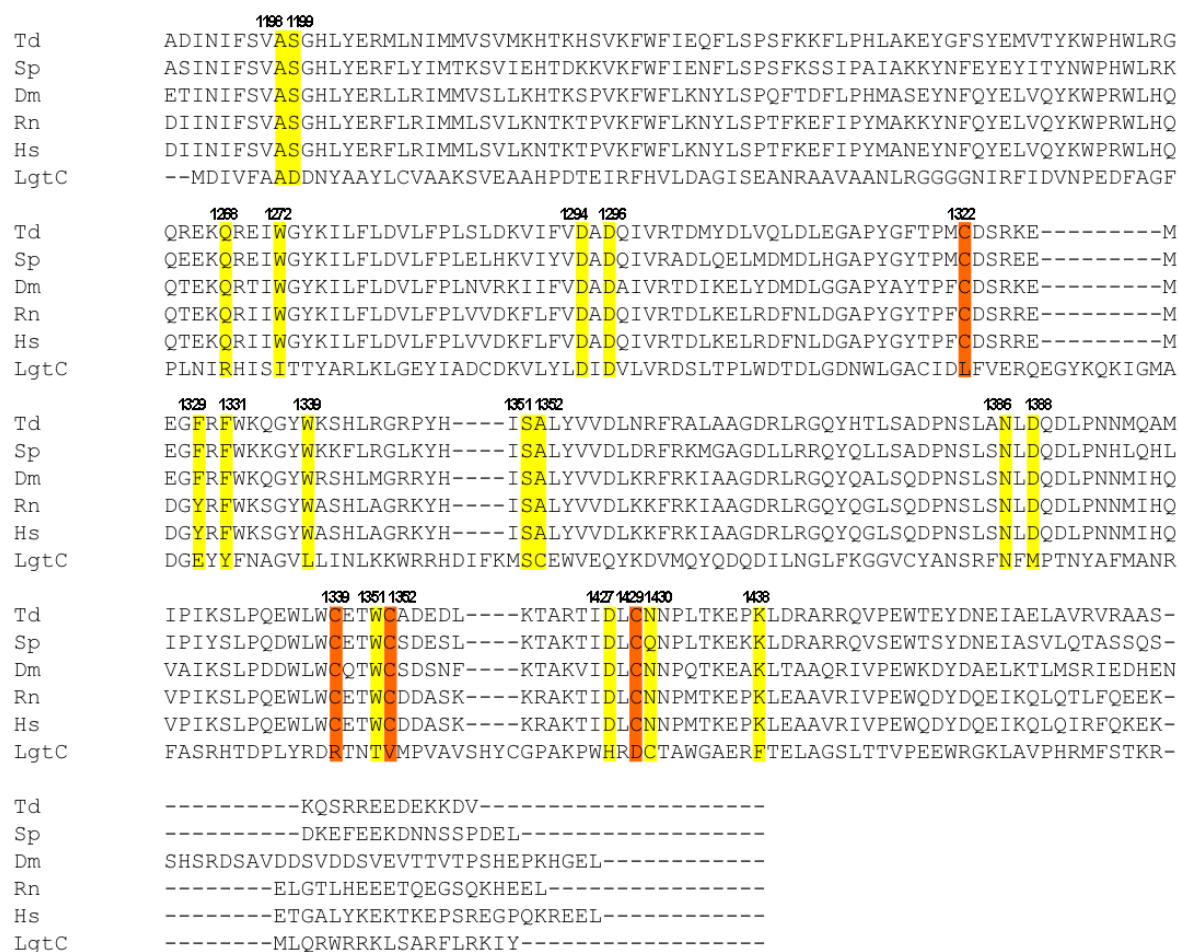

**Fig. S3.** Sequence alignment of the catalytic domain of UGGT across species (Td, *T. dupontii*; Sp, *Schizosaccharomyces pombe*; Dm, *Drosophila melanogaster*; Rn, *Rattus norvegicus*; Hs, *Homo sapiens*) together with *Neisseria meningitidis*  $\alpha$ -galactosyltransferase, LgtC. The secondary structures of *T. dupontii* UGGT<sup>CAT</sup> are indicated above the amino acid sequence. Residues involved in the ligand interactions are highlighted in yellow.

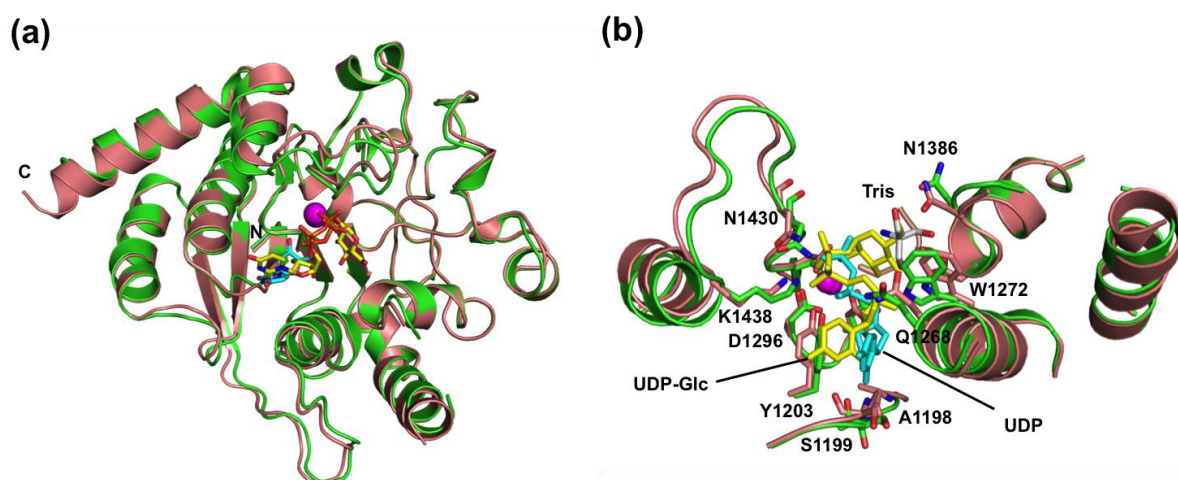

**Fig. S4.** Structural comparison between UDP-Glc- and UDP-bound structures of UGGT<sup>CAT</sup>. The UDP-Glc-bound and UDP-bound forms are coloured pink and green, and the overall and close-up views are presented in (a) and (b), respectively. The bound Ca<sup>2+</sup> is shown as a magenta sphere. The bound UDP-Glc, UDP and Tris molecules are shown in yellow, cyan and white, respectively. Residues involved in the ligand binding are shown in stick models.

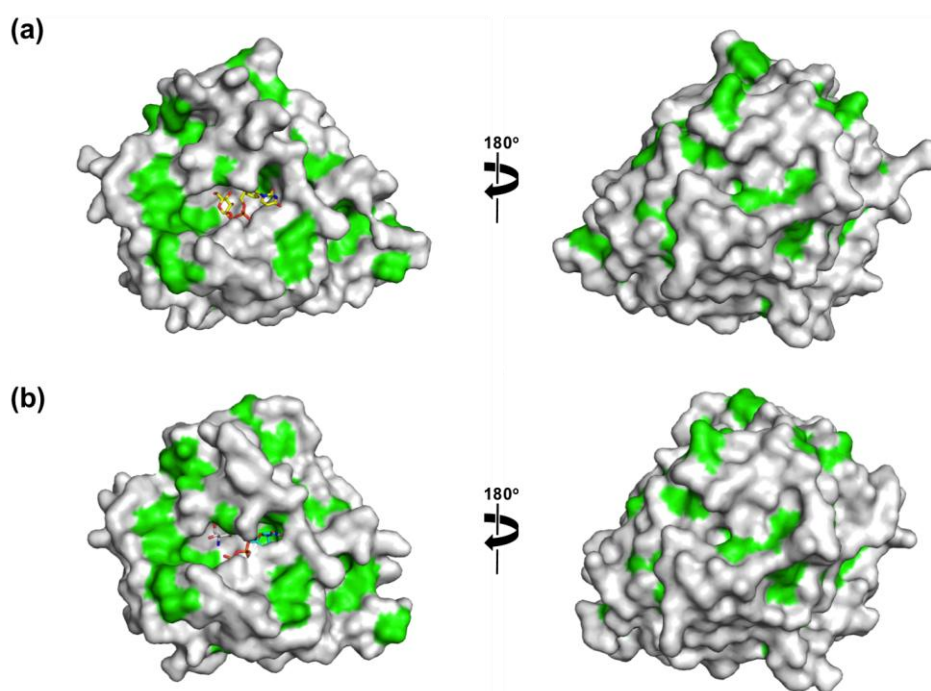

**Fig. S5.** Surface hydrophobicity of catalytic domain of UGGT. Molecular surface representation of the catalytic domain of UGGT: (a) UDP-Glc-bound form, (b) UDP-bound form. The hydrophobic residues are shown in green.

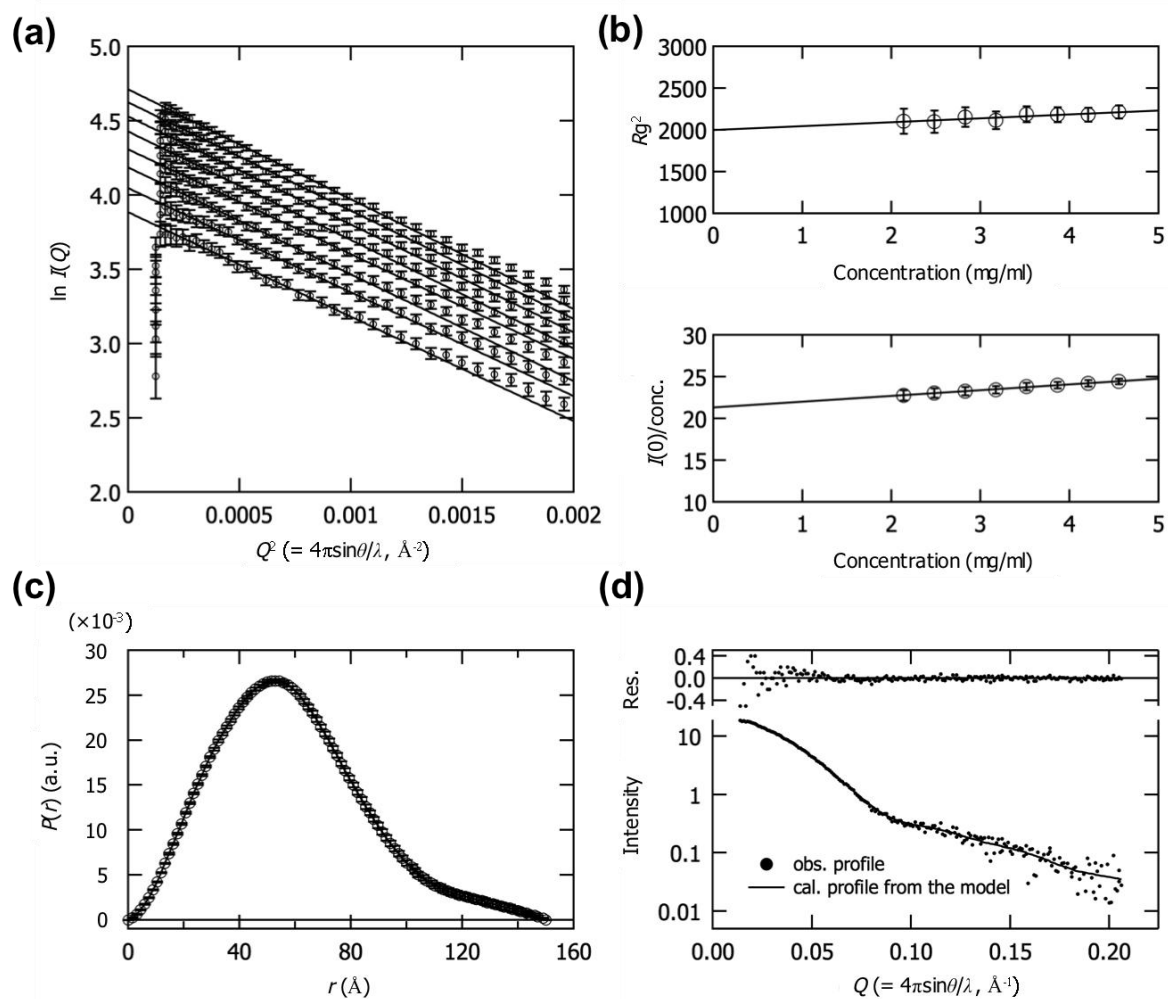

**Fig. S6.** (a) Guinier plots of UGGT<sup>FL</sup> at different concentrations. (b) Concentration dependence of  $Rg^2$  of UGGT (upper panel).  $Rg^2$  was plotted against protein concentration. Concentration dependence of  $I(0)/\text{conc.}$  for UGGT (lower panel). (c)  $P(r)$  function of UGGT calculated from the SAXS curve extrapolated to a protein concentration of zero. (d) The calculated curve from the DAMMIN bead model superposed on the experimental scattering curve of the UGGT<sup>FL</sup>.

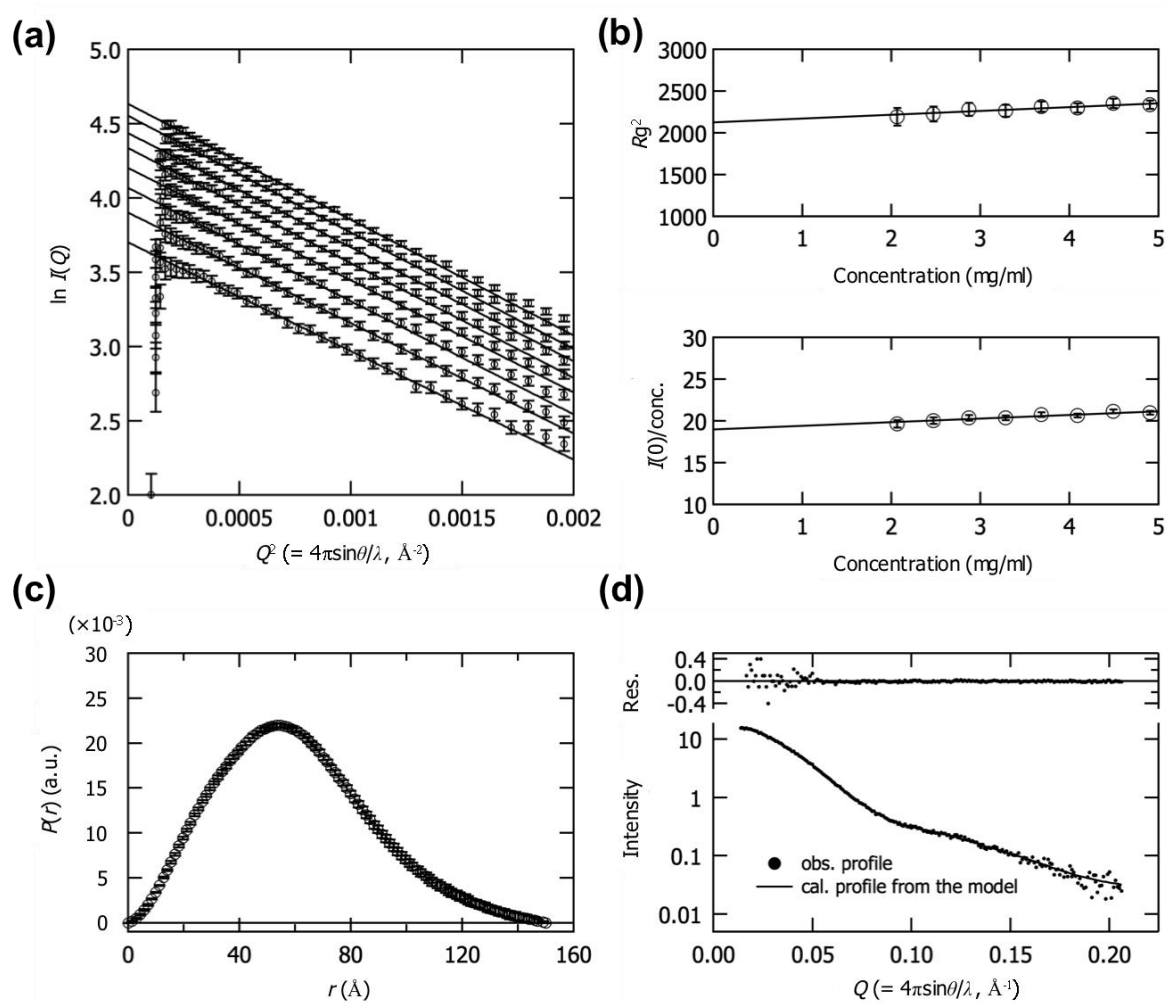

**Fig. S7.** (a) Guinier plots of UGGT<sup>N</sup> at different concentrations. (b) Concentration dependence of  $Rg^2$  of UGGT<sup>N</sup> (upper panel).  $Rg^2$  was plotted against protein concentration. Concentration dependence of  $I(0)/\text{conc.}$  for UGGT<sup>N</sup> (lower panel). (c)  $P(r)$  function of UGGT<sup>N</sup> calculated from the SAXS curve extrapolated to a protein concentration of zero. (d) The calculated curve from the DAMMIN bead model superposed on the experimental scattering curve of the UGGT<sup>N</sup>.

|                                                            |                                |                                  |
|------------------------------------------------------------|--------------------------------|----------------------------------|
| 29-1480<br>(FL)                                            | Segment 1<br>672-833<br>(Trx3) | Segment 2<br>469-833<br>(Trx2-3) |
| Segment 3<br>29-833<br>( $\beta$ +Trx1+Trx4+<br>Trx2+Trx3) | Segment 4<br>29-1189<br>(N)    | 1190-1480<br>(CAT)               |

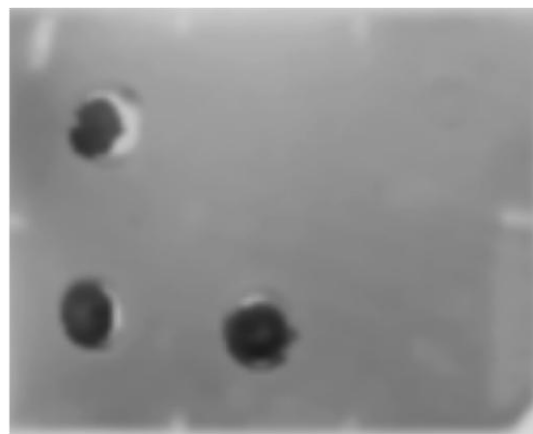

**Fig. S8.** Epitope mapping of anti-UGGT antibody. Epitope mapping of the antibody was performed by a dot blot method using the CAT domain and four fragments derived from UGGT<sup>N</sup>.

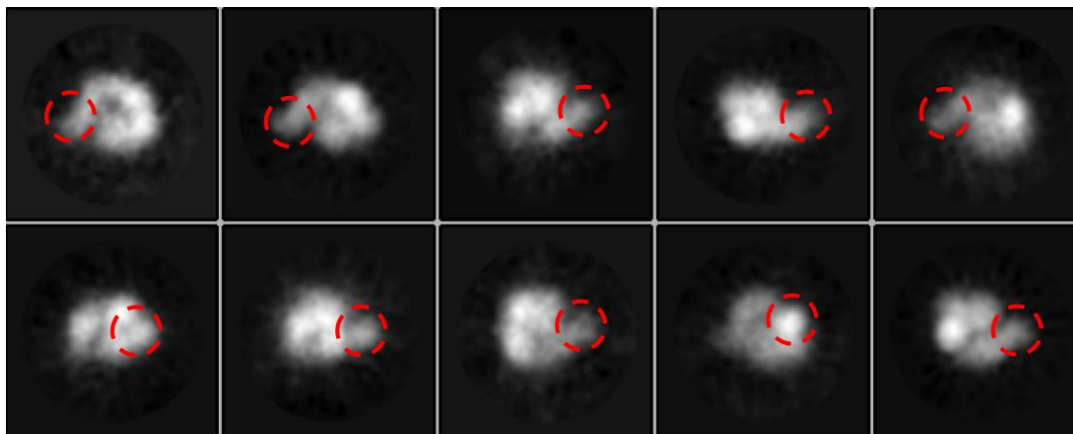

**Fig. S9.** Negative-stain EM analysis of UGGT<sup>FL</sup>/anti-Trx4 Fab complex. 2D classes of UGGT particle subjected to single-particle negative-EM analysis. Predicted positions of anti-Trx4 Fab are marked with red dashed circles.

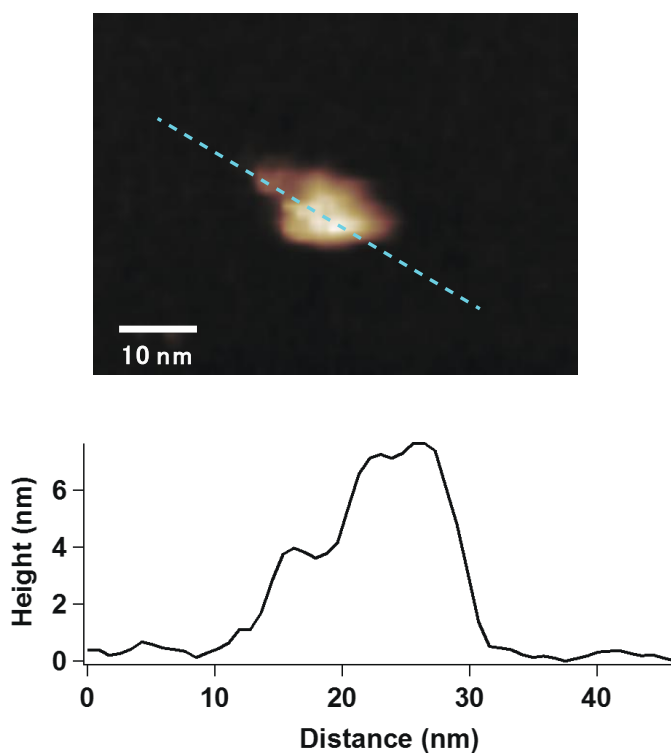

**Fig. S10.** Typical HS-AFM image of N-terminally His<sub>6</sub>-tagged full-length UGGT (Upper, Sample #10, Supplemental Video S1) with a cross-sectional profile (lower).

Sample 1

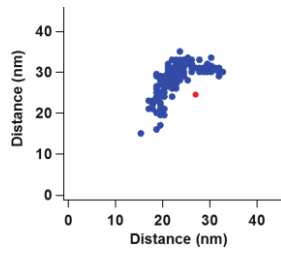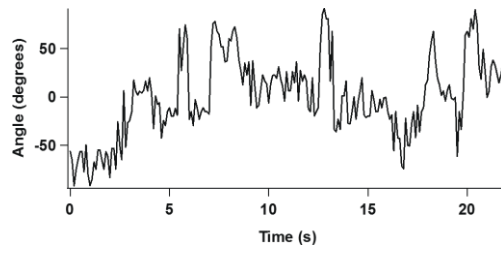

Sample 2

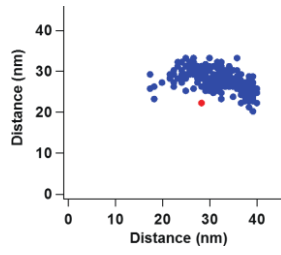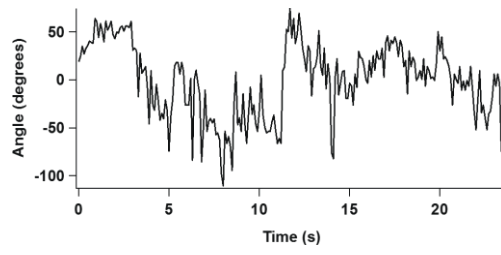

Sample 3

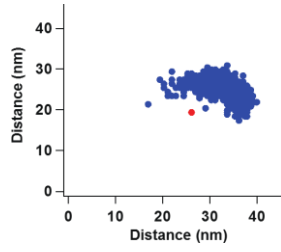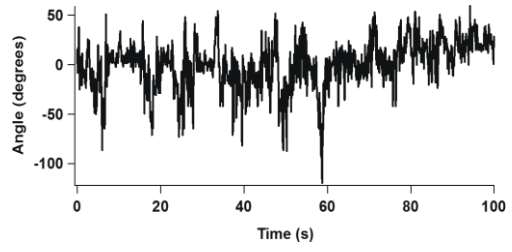

Sample 4

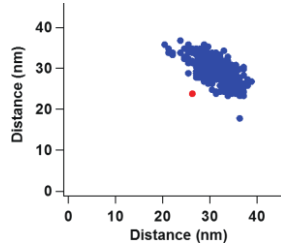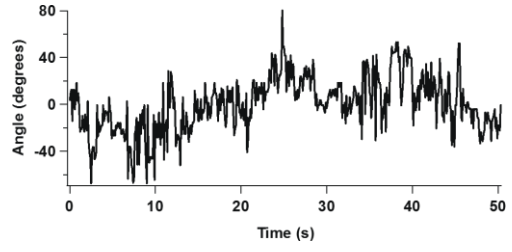

Sample 5

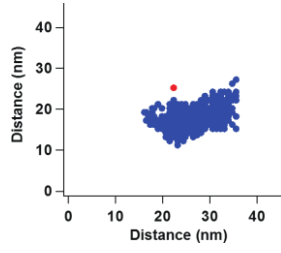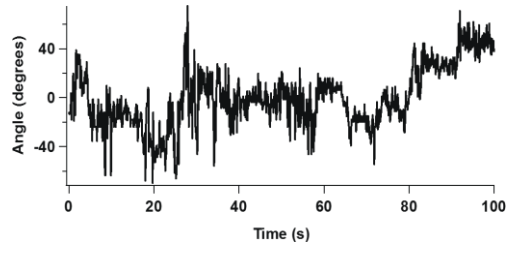

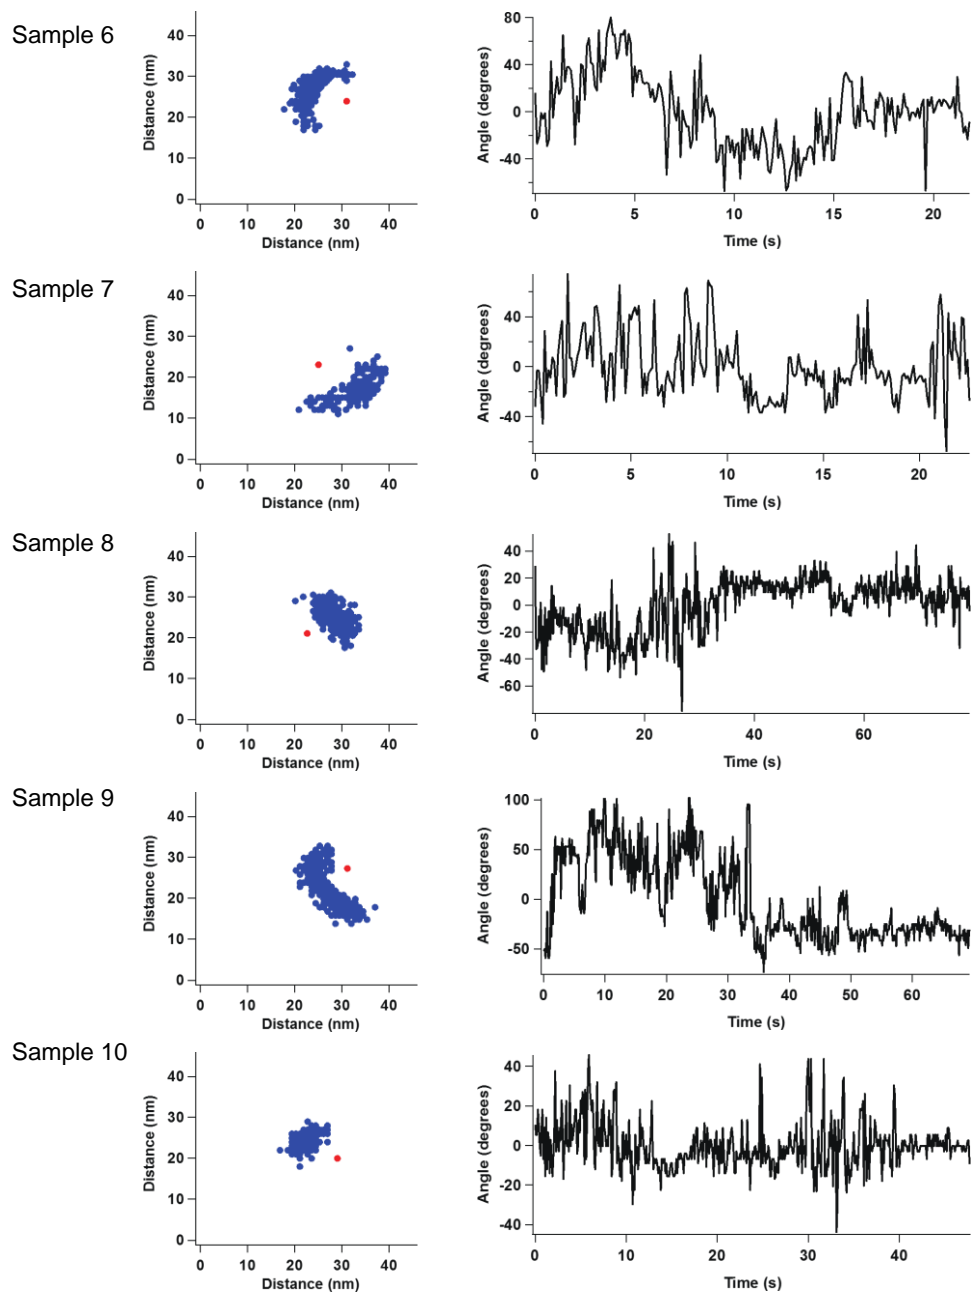

**Fig. S11.** Distribution of relative positions between centres of N- and C-lobes of *T. dupontii* UGGT in the HS-AFM measurements. The red plot indicates the normalised position of the centre of the N-lobe, whereas the blue plots indicate those of the C-lobe (left panel). Time series of the angles between two lobes (right panel). Zero angle corresponds to the averaged value in each dataset.



**Video S1.** Typical HS-AFM real-time image of N-terminally His<sub>6</sub>-tagged, UGGT<sup>FL</sup> (Sample #10). The N-terminally His<sub>6</sub>-tagged UGGT was applied to Ni<sup>2+</sup>-treated AFM surface.

**Video S2.** Typical HS-AFM real-time image of C-terminally His<sub>6</sub>-tagged, UGGT<sup>FL</sup>. The C-terminally His<sub>6</sub>-tagged UGGT was applied to the Ni<sup>2+</sup>-treated AFM surface.

**Video S3.** Typical HS-AFM real-time image of deformed UGGT<sup>FL</sup> (N-terminally His<sub>6</sub>-tagged construct). The deformed images were obtained by intentional disruption using an AFM tip.
